# Supplementary material for: Patient‐Reported Reasons for Declining or Discontinuing Statin Therapy: Insights From the PALM Registry
Source: PubMed Central journal article supplement — J Am Heart Assoc. 2019 Mar 27;8(7):e011765. doi: 10.1161/JAHA.118.011765 (PMC6509731; doi:10.1161/jaha.118.011765), 2019-03-27

# **SUPPLEMENTAL MATERIAL**

## Data S1.

### PALM SURVEY QUESTIONS

The following questions were asked of PALM participants used in this analysis

[FOR FORMER STATIN USERS]

**If your doctor recommended it, how likely would you be to try another statin to lower your cholesterol or reduce your risk of heart attack or stroke?**

[Select one]

Not at all

Unlikely

Possibly

Very Likely

Almost certainly

Do not know

**What was the reason for stopping your last statin? Please select all that apply.**

My doctor felt it was no longer needed

I didn't like taking a medication every day

Too expensive / cost

I lost/changed my insurance

I did not notice any improvement in how I felt while on this medication

I prefer natural remedies or supplements instead of prescription medicines

I had side effects

A friend or relative recommended I stop

Information I read (online, magazine) or heard suggested that I stop

I don't know / can't remember

Other \_\_\_\_\_

[FOR THOSE NOT ON A STATIN]

**Has your doctor ever recommended you take a cholesterol-lowering medication called a statin? Examples include atorvastatin (Lipitor, Caduet), rosuvastatin (Crestor), pravastatin (Pravachol), simvastatin (Zocor, Vytorin, Simcor), fluvastatin (Lescol), lovastatin (Mevacor, Advicor), and pitavastatin (Livalo).**

yes

no

don't remember

[IF RECOMMENDED BUT NOT ON STATIN]

**Why are you not currently on a statin? Please select all that apply.**

I am concerned about side effects

Too expensive / cost

Lack of insurance

I don't like to take prescription medications

I would rather focus on diet and exercise

I prefer natural remedies or supplements instead of prescription medicines

I don't think I need a cholesterol lowering medication

Other: \_\_\_\_\_

I don't know / can't remember



**Table S1. Risk Factors Associated with Never Being Offered Statin Therapy.**

|                                    | <b>RR</b> | <b>CI</b>         | <b>P value</b> |
|------------------------------------|-----------|-------------------|----------------|
| <b>Age</b>                         |           |                   |                |
| Every 5-yr increase when age <60   | 0.90      | 0.83 - 0.97       | 0.004          |
| Every 5-yr increase when age 60-75 | 1.15      | 1.05 - 1.26       | 0.003          |
| Every 5-yr increase when age >75   | 0.80      | 0.65 – 1.00       | 0.05           |
| <b>Sex</b>                         |           |                   |                |
| Male                               | 0.82      | 0.71 - 0.94       | 0.006          |
| Female                             | 1.22      | 1.06 – 1.41       | 0.006          |
| <b>Race</b>                        |           |                   |                |
| Asian                              | 1.32      | 0.91 - 1.92       | 0.14           |
| Black                              | 1.48      | 1.20 - 1.80       | 0.0001         |
| Hispanic                           | 1.07      | 0.88026 - 1.34950 | 0.55           |
| <b>Education</b>                   |           |                   |                |
| At least some college              | 1.02208   | 0.87- 1.19        | 0.78           |
| <b>Income</b>                      |           |                   |                |
| \$35,000-\$74,999                  | 0.89      | 0.75 - 1.05       | 0.17           |
| \$75,000-\$99,000                  | 1.08      | 0.82 - 1.43       | 0.59           |
| > \$100,000                        | 0.94      | 0.72- 1.21        | 0.61           |
| <b>Insurance</b>                   |           |                   |                |
| Government                         | 0.89      | 0.74 - 1.06       | 0.17           |
| Other/none                         | 1.38      | 1.06 - 1.81       | 0.02           |
| <b>Practice type</b>               |           |                   |                |
| Cardiology                         | 0.43      | 0.33 - 0.56       | <.0001         |
| Endocrinology                      | 0.67      | 0.45 - 1.01       | 0.05           |

**Table S2. Percentage of Missing Responses on Patient Belief Questionnaire by Statin Use Status.**

| <b>Patient beliefs</b>                                                        | <b>Current Users</b> | <b>Discontinued Statin Therapy</b> | <b>Declined Statin Therapy</b> | <b>Never Offered Statin Therapy</b> |
|-------------------------------------------------------------------------------|----------------------|------------------------------------|--------------------------------|-------------------------------------|
| I worry about a heart attack or stroke                                        | 286 (6.8%)           | 28 (6.0%)                          | 2 (1.3%)                       | 111 (12.4%)                         |
| My risk of heart attack or stroke compared to others                          | 75 (1.8%)            | 8 (1.7%)                           | 2 (1.3%)                       | 66 (7.4%)                           |
| People with high cholesterol are more likely to have heart attack or stroke   | 255 (6.5%)           | 35 (7.9%)                          | 11 (7.6%)                      | 112 (13.4%)                         |
| People don't need to worry about cholesterol if they never had a heart attack | 412 (10.1%)          | 52 (11.6%)                         | 18 (12.2%)                     | 154 (18.0%)                         |
| Statins are effective                                                         | 352 (9.3%)           | 47 (12.2%)                         | 17 (14.8%)                     | 157 (23.7%)                         |
| Statins are safe                                                              | 425 (11.9%)          | 58 (15.0%)                         | 19 (15.6%)                     | 166 (27.2%)                         |
| Statins can cause diabetes                                                    | 456 (18.5%)          | 52 (19.0%)                         | 19 (22.6%)                     | 166 (37.6%)                         |
| Statins can cause muscle aches or pain                                        | 441 (14.1%)          | 40 (10.4%)                         | 18 (16.7%)                     | 164 (33.9%)                         |
| Statins can cause liver damage                                                | 453 (16.9%)          | 53 (16.7%)                         | 18 (18.8%)                     | 164 (34.9%)                         |
| Statins can cause memory loss                                                 | 457 (18.8%)          | 52 (19.1%)                         | 19 (21.8%)                     | 167 (39.7%)                         |

**Figure S1. Patient-Reported Willingness to Retry or Start Statin Therapy.**

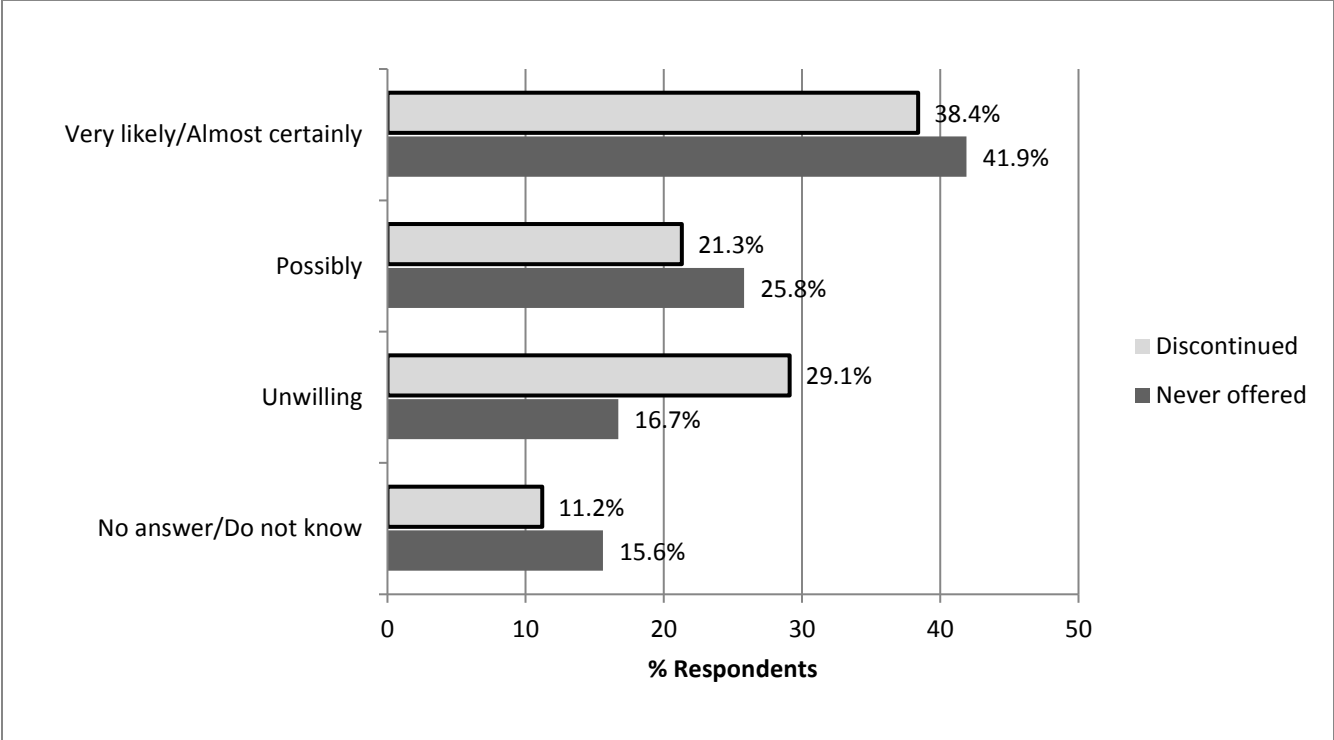

Supplement: JAH3-8-e011765-s001.pdf [file JAH3-8-e011765-s001.pdf]
